# Supplementary figures and images for: Nitro-oleic acid, a ligand of CD36, reduces cholesterol accumulation by modulating oxidized-LDL uptake and cholesterol efflux in RAW264.7 macrophages
Source: PubMed Central journal article supplement — Redox Biol. 2020 Jun 2;36:101591. doi: 10.1016/j.redox.2020.101591 (PMC7287307; doi:10.1016/j.redox.2020.101591), 2020-06-02

**Fig. S1**

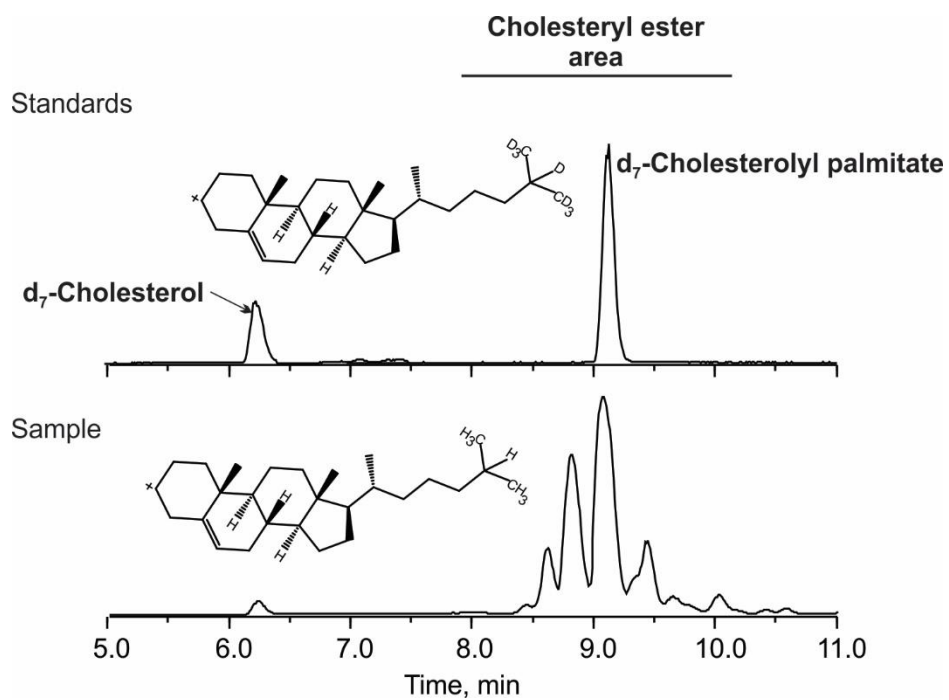

Fig. S2

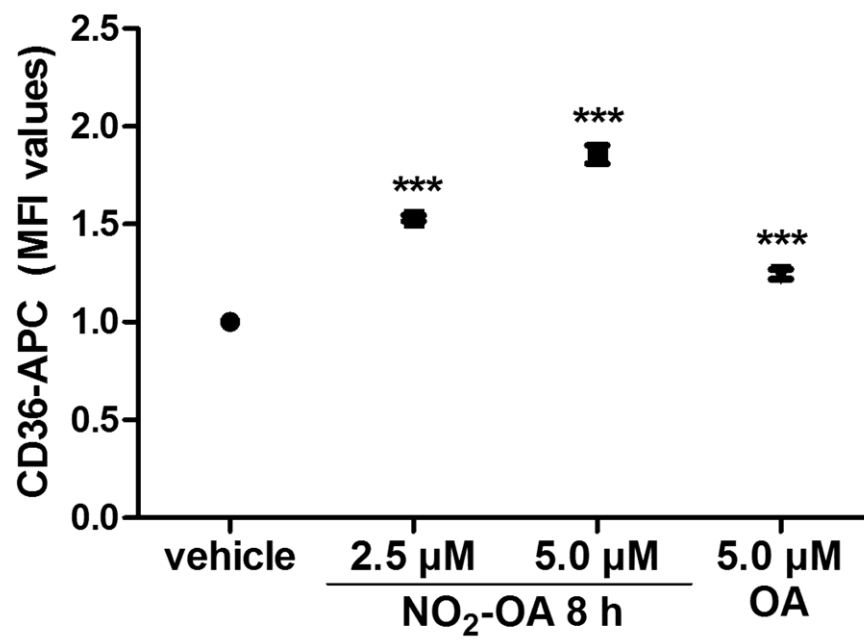

Fig. S3

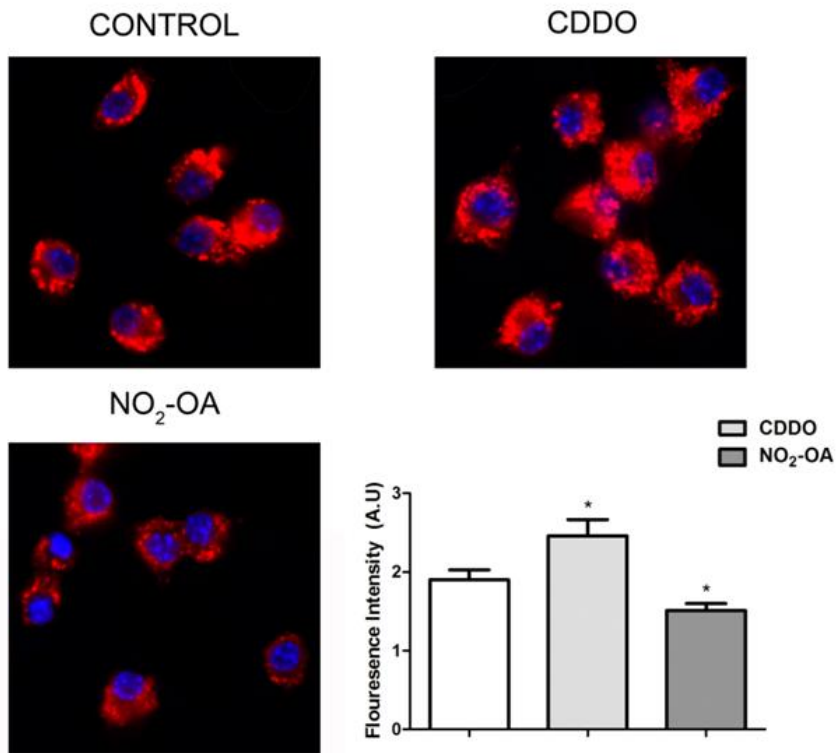

**Fig. S4**

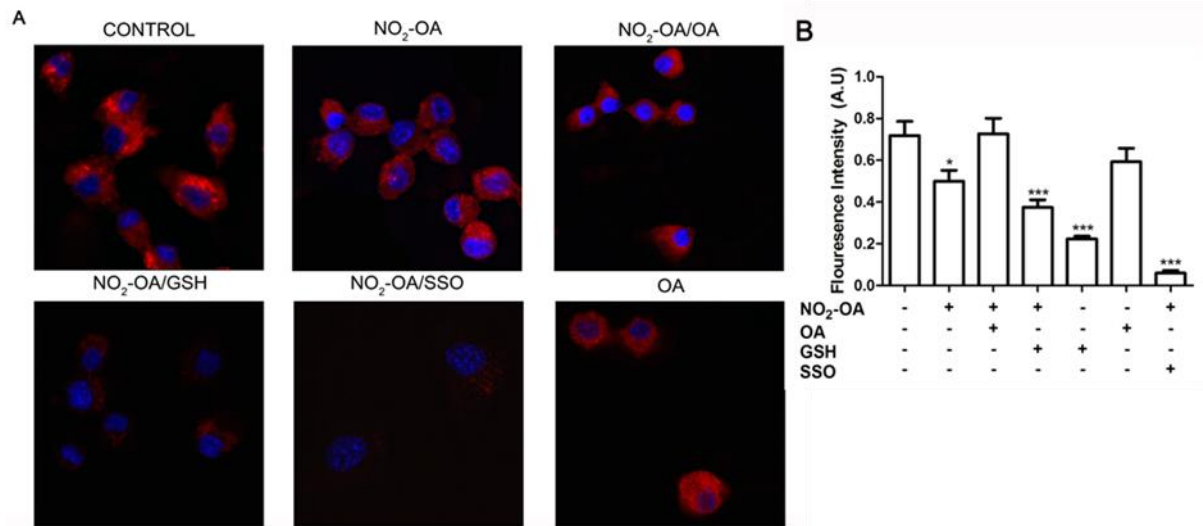

**Fig. S5**

**A**

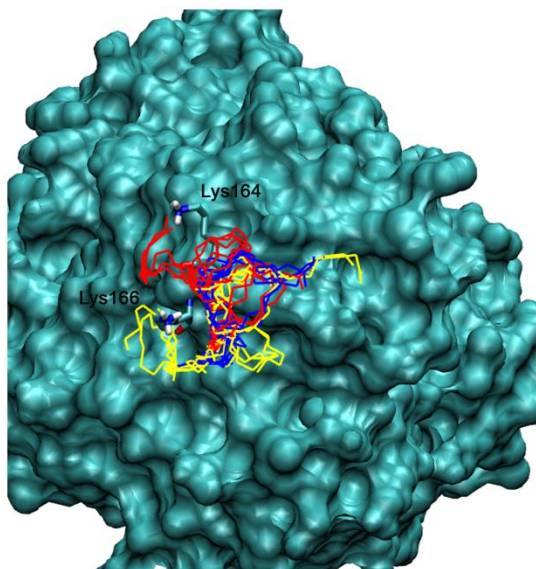

**B**

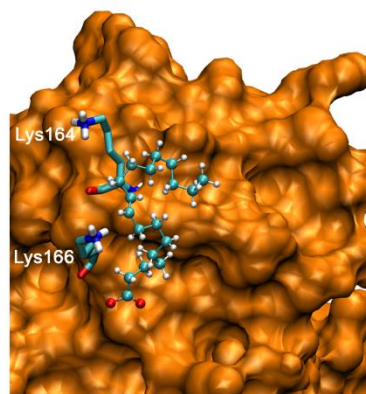

**C**

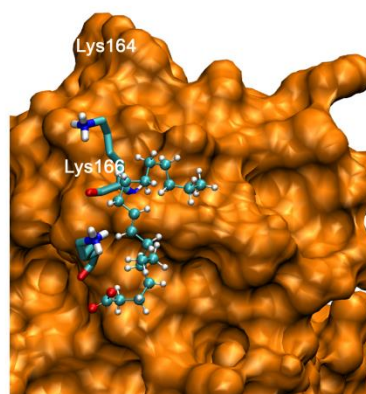

**D**

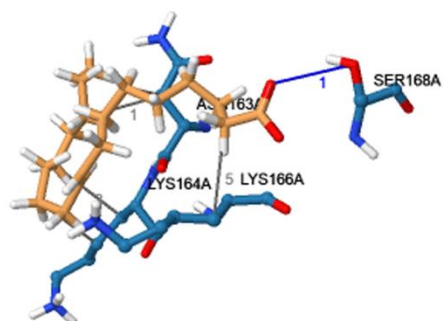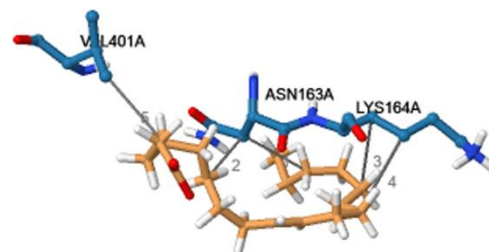

**Fig. S6**

**A**

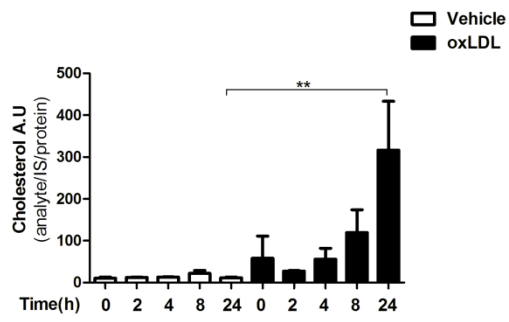

**B**

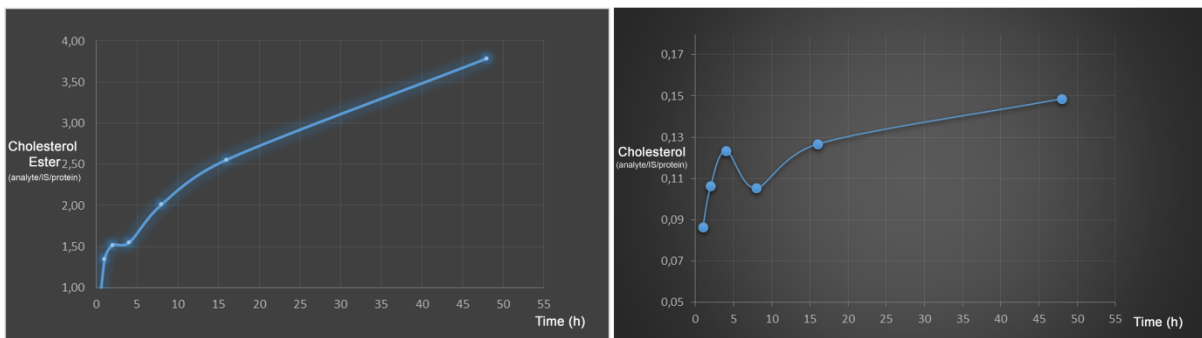

Fig. S7

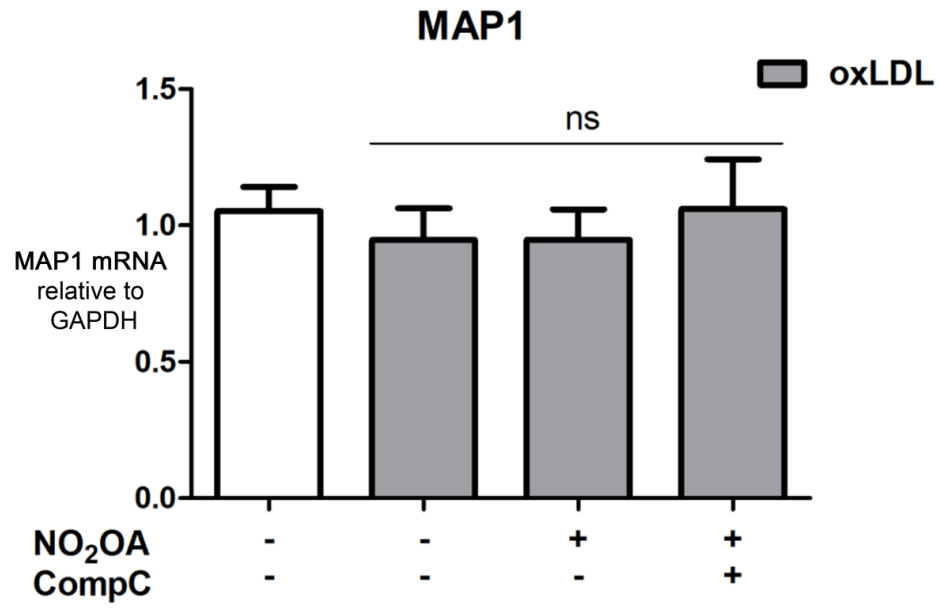

Fig. S8

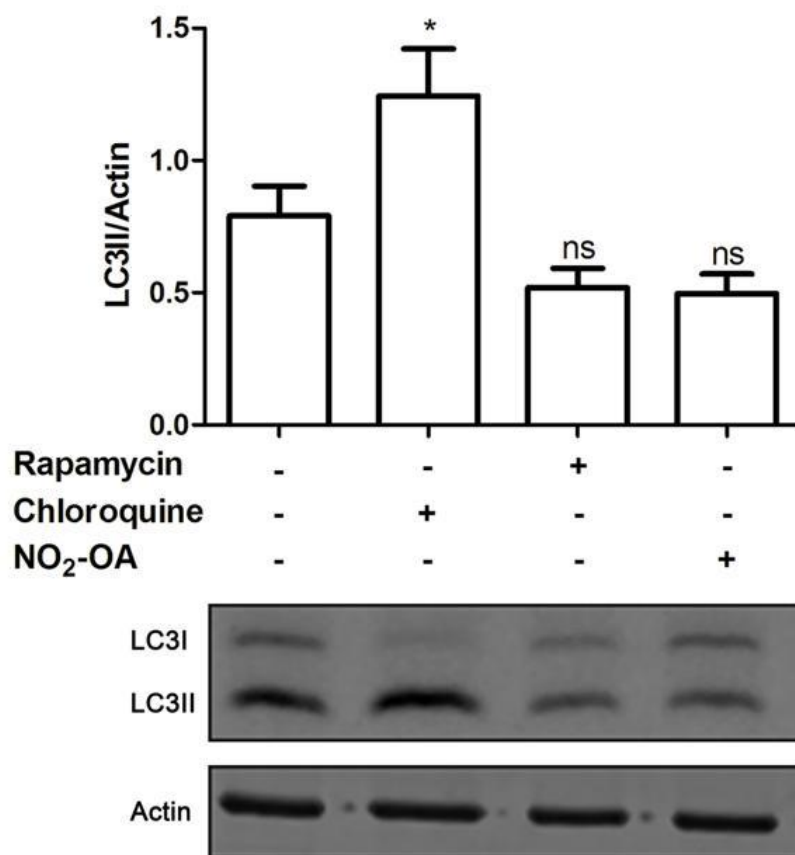



**Fig. S9**

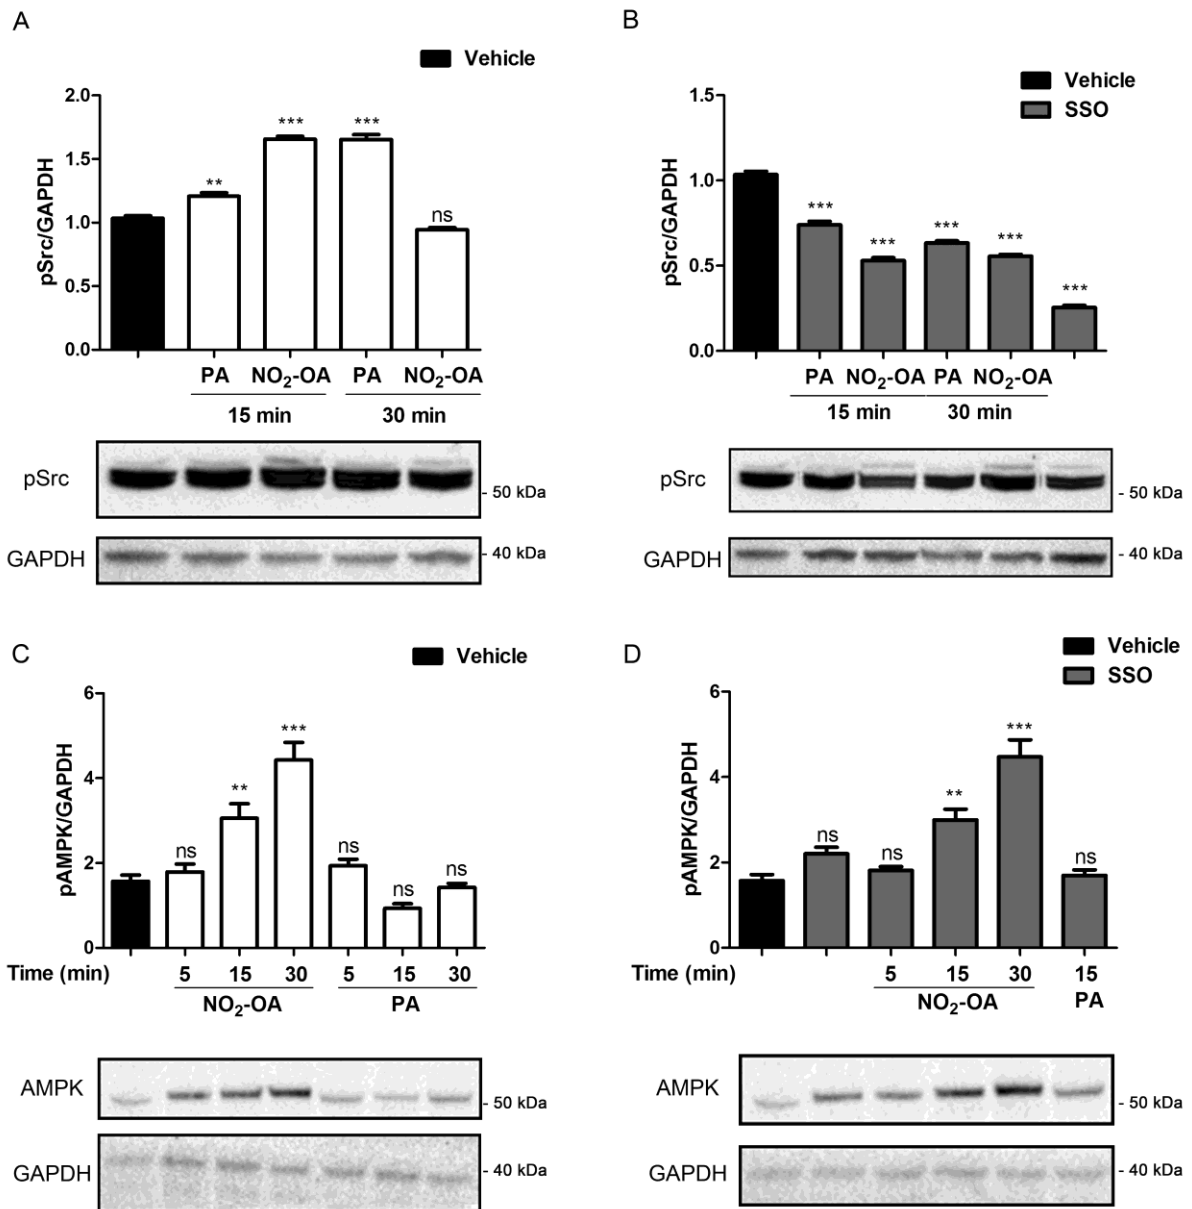

Supplement: mmc1.pdf [file mmc1.pdf]
